# Supplementary material
Source: PubMed Central journal article supplement (PMC2329278)

## **SUPPLEMENTAL FIGURE FOR EN-07-1561v2**

**Supplemental Figure 1:** Effects of Temperature on non-reducing and non-heat-denaturing SDS-PAGE separation of adiponectin

The sample incubation temperature was varied for the same female human serum sample (0.5  $\mu$ L) that was diluted in 1X SDS-Sample Buffer without any reducing agent. For heat-denaturation, samples were heated at 95 °C for 10 min (last lane). The remaining protocol was the same as original described in Waki et al (5). Proteins were detected by fluorescent Western blotting using IRDye<sup>®</sup> 800 fluorescent labeled secondary antibodies and quantified as described in the experimental procedures section. A high molecular weight band (> 300 kDa) was readily detected and quantified as shown while all other bands appear as a ladder under the HMW band. Varying the incubation temperature altered the amount of HMW protein recovered on the Western blot.

kDa

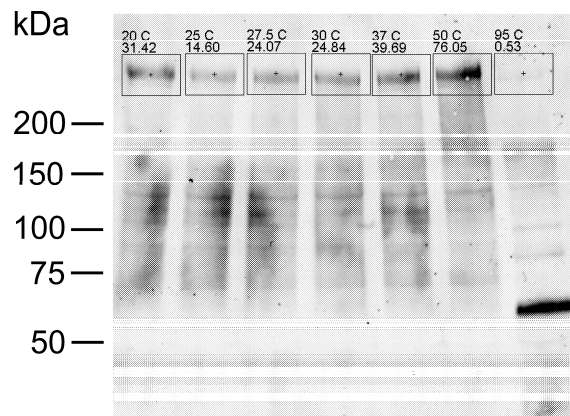

Supplement: endo_en.2007-1561_1.pdf [file endo_en.2007-1561_1.pdf]
